# Supplementary material
Source: PubMed Central journal article supplement (PMC6365285)
Supplement: NIHMS1506466-supplement-3.pdf [file NIHMS1506466-supplement-3.pdf]

**Supplementary Table S2.** Somatic mutation concordance between patient tumor material and organoids.

| Sample Pair                                    | Patient Tumor |          |              | Organoid |          |              |
|------------------------------------------------|---------------|----------|--------------|----------|----------|--------------|
|                                                | Paired        | Unpaired | Percent      | Paired   | Unpaired | Percent      |
| DF-17-103 Omentum metastasis                   | 61            | 0        | 100.0%       | 61       | 0        | 100.0%       |
| DF-17-104 Omentum metastasis                   | 101           | 1        | 99.0%        | 101      | 19       | 84.2%        |
| DF-17-107 Left ovary mass                      | 89            | 12       | 88.1%        | 89       | 0        | 100.0%       |
| DF-17-107 Omentum metastasis                   | 99            | 11       | 90.0%        | 99       | 1        | 99.0%        |
| DF-17-107 Right ovary mass                     | 71            | 17       | 80.7%        | 71       | 0        | 100.0%       |
| DF-17-115 Left ovary mass                      | 205           | 26       | 88.7%        | 205      | 5        | 97.6%        |
| DF-17-116 Omentum metastasis                   | 85            | 0        | 100.0%       | 85       | 1        | 98.8%        |
| DF-17-121 Pleural effusion                     | 85            | 1        | 98.8%        | 85       | 1        | 98.8%        |
| DF-17-123 Left ovary mass                      | 82            | 62       | 56.9%        | 82       | 23       | 78.1%        |
| DF-17-123 Omentum metastasis                   | 88            | 35       | 71.5%        | 88       | 0        | 100.0%       |
| DF-17-123 Right ovary mass                     | 121           | 4        | 96.8%        | 121      | 0        | 100.0%       |
| DF-17-126 Omental metastasis                   | 309           | 5        | 98.4%        | 309      | 4        | 98.7%        |
| DF-17-132 Post-Neoadjuvant Cecal met           | 33            | 1        | 97.1%        | 33       | 1        | 97.1%        |
| DF-17-132 Post-nedadjuvant Omentum metastasis  | 25            | 0        | 100.0%       | 25       | 0        | 100.0%       |
| DF-17-134 Left ovary mass                      | 49            | 2        | 96.1%        | 49       | 1        | 98.0%        |
| DF-17-134 Right ovary mass                     | 44            | 2        | 95.7%        | 44       | 1        | 97.8%        |
| DF-17-39-Diaphragm metastasis                  | 165           | 2        | 98.8%        | 165      | 9        | 94.8%        |
| DF-17-39 Rectosigmoid mesentery metastasis     | 159           | 14       | 91.9%        | 159      | 19       | 89.3%        |
| DF-17-39 Supcolic omentum metastasis           | 143           | 0        | 100.0%       | 143      | 3        | 97.9%        |
| DF-17-39 Transverse colon mesentery metastasis | 153           | 10       | 93.9%        | 153      | 1        | 99.4%        |
| DF-18-1 Omentum metastasis                     | 61            | 2        | 96.8%        | 61       | 1        | 98.4%        |
| DF-18-12 Left ovary mass                       | 111           | 0        | 100.0%       | 111      | 1        | 99.1%        |
| DF-18-23 Right ovary mass                      | 262           | 18       | 93.6%        | 262      | 1        | 99.6%        |
| DF-18-30 Left ovary mass                       | 174           | 0        | 100.0%       | 174      | 14       | 92.6%        |
| DF-18-43 Left ovary mass                       | 77            | 8        | 90.6%        | 77       | 0        | 100.0%       |
| DF-18-43 Omentum metastasis                    | 101           | 2        | 98.1%        | 101      | 2        | 98.1%        |
| DF-18-47 Omentum metastasis                    | 107           | 0        | 100.0%       | 107      | 1        | 99.1%        |
| DF-18-48 Omentum metastasis                    | 21            | 0        | 100.0%       | 21       | 0        | 100.0%       |
| DF-18-50 Omentum metastasis                    | 40            | 0        | 100.0%       | 40       | 2        | 95.2%        |
| DF-18-54 Omentum metastasis                    | 84            | 1        | 98.8%        | 84       | 1        | 98.8%        |
| DF-18-7 Right ovary mass                       | 85            | 0        | 100.0%       | 85       | 0        | 100.0%       |
| DF-18-8 Colonic mesentery metastasis           | 133           | 1        | 99.3%        | 133      | 3        | 97.8%        |
| <b>MEDIAN</b>                                  |               |          | <b>98.2%</b> |          |          | <b>98.8%</b> |
